# Supplementary material for: No Clinically Relevant Effect of Heart Rate Increase and Heart Rate Recovery During Exercise on Cardiovascular Disease: A Mendelian Randomization Analysis
Source: Front Genet. 2021 Feb 18;12:569323. doi: 10.3389/fgene.2021.569323 (PMC7931909; doi:10.3389/fgene.2021.569323)
Supplement: Supplementary file 8 [file Table_6.xlsx]

## Sheet: ST6
Supplementary Table 6: Power calculations using a non-centrality parameter-based approach, implemented in a publicly available mRnd web tool (http://cnsgenomics.com/shiny/mRnd/).
Exposure	Outcome	Sample size	Alpha	Actual OR	P	Power	K	R2	Detectable OR (with 80% power)
HRI	CV	375367	0.05	1.0111	0.411	0.05	0.054	0.0112	1.1925
HRI	ACM	393165	0.05	0.997	0.474	0.05	0.044	0.0112	0.795
HRI	CAD	547261	0.05	1.09637	0.126	0.87	0.2243	0.0112	1.087
HRI	IS	521612	0.05	0.960789	0.701	0.17	0.129	0.0112	1.111
HRI	AF	1030846	0.05	1.21774	0.39	1	0.059	0.0112	1.112
HRR	CV	375367	0.05	1.003	0.48	0.05	0.054	0.0075	1.235
HRR	ACM	393165	0.05	0.998	0.659	0.05	0.044	0.0075	0.75
HRR	CAD	547261	0.05	1.09417	0.0944	0.69	0.2243	0.0075	1.107
HRR	IS	521612	0.05	1.0629	0.572	0.26	0.129	0.0075	1.135
HRR	AF	1030846	0.05	0.858988	0.484	0.84	0.059	0.0075	0.865
Resting HR	CV	375367	0.05	1.001	0.807	0.05	0.054	0.0263	1.125
Resting HR	ACM	393165	0.05	0.999	0.821	0.05	0.044	0.0263	0.867
Resting HR	CAD	547261	0.05	1.004	0.897961	0.07	0.2243	0.091	1.0305
Resting HR	IS	521612	0.05	0.928672	0.009817	1	0.129	0.091	0.962
Resting HR	AF	1030846	0.05	0.83778	9.8e-06	1	0.059	0.091	0.9615
ACM, all-cause mortality; Actual OR, odds ratio from the MR analysis with the inverse variance weighted method per 10 bpm increase in the exposure; AF, atrial fibrillation; Alpha, Type-I error rate; CAD, coronary artery disease; CV, cardiovascular risk; Detectable OR, smallest detectable odds ratio (power = 0.8, alpha = 0.05) in Mendelian Randomization analysis; HR, heart rate; HRI, heart rate in…
